# Supplementary material for: Back to the future: re-establishing guinea pigin vivoasthma models
Source: Oxford University Press journal article supplement (doi:10.1042/cs20200394), 2020-06-01
Supplement: cs-2020-0394_supp.pdf [file cs-2020-0394_supp.pdf]

**Suppl. Table 1.** Tools for ELISA

| <b>Target</b>                  | <b>Clone</b> | <b>Manufacturer</b>          | <b>Product number</b> |
|--------------------------------|--------------|------------------------------|-----------------------|
| <b>CCL3</b>                    | polyclonal   | R&D systems                  | AF-270/AF-450         |
| <b>CCL5</b>                    | 21418        | R&D systems                  | MAB678                |
| <b>CCL11</b>                   | 43911        | R&D systems                  | MAB320                |
| <b>CXCL8</b>                   | 6217         | R&D systems                  | MAB208                |
| <b>IFN-<math>\gamma</math></b> | K3.53        | R&D systems                  | MAB2852               |
| <b>IgG1</b>                    | kit          | My Biosource                 | MBS765111             |
| <b>IL-4</b>                    | 3010         | R&D systems                  | MAB604                |
| <b>IL-5</b>                    | TRFK5        | BD Pharmingen/BD Biosciences | 554392                |
| <b>IL-8</b>                    | kit          | Casubio                      | CSB-E13096Gp          |
| <b>IL-8</b>                    | set          | R&D systems                  | DY208                 |
| <b>IL-10</b>                   | 127107       | R&D systems                  | MAB2172               |
| <b>IL-13</b>                   | kit          | Casubio                      | CSB-E12916Gp          |
| <b>IL-13</b>                   | kit          | R&D systems                  | DY213                 |
| <b>IL-17A</b>                  | 41809        | R&D systems                  | MAB317                |
| <b>Neurokinin A</b>            | kit          | Ray Biotech                  | EIA-NEA               |
| <b>PGE2</b>                    | kit          | R&D systems                  | KGE004B               |
| <b>Substance P</b>             | kit          | ABCAM                        | AB133029              |
| <b>TGF-<math>\beta</math>1</b> | BAF240       | R&D systems                  | Polyclonal            |
| <b>TNF-<math>\alpha</math></b> | set          | R&D systems                  | DY5035                |

**Suppl. Table 2.** Tools for flow cytometry

| <b>Target</b>                  | <b>Clone</b> | <b>Labelling</b> | <b>Manufacturer</b> | <b>Product number</b> |
|--------------------------------|--------------|------------------|---------------------|-----------------------|
| <b>CD25</b>                    | 740290       | PE               | BD Bioscience       | M-A251                |
| <b>CD4</b>                     | CT7          | FITC and PE      | AbDSerotec          | MCA749F               |
| <b>FOXP3</b>                   | PCH101       | PE-Cy5           | eBioscience         | 14-4776-80            |
| <b>IFN-<math>\gamma</math></b> | B27          | APC              | BD Bioscience       | 554702                |
| <b>IL-10</b>                   | JES3-19F1    | PE               | eBioscience         | 554706                |
| <b>IL-13</b>                   | JES10-5A2    | APC              | Biolegend           | 501908                |
| <b>IL-17A</b>                  | SCPL1362     | PE               | BD Bioscience       | 560438                |
| <b>PAN T-cell</b>              | CT5          | FITC and APC     | AbDSerotec          | MCA751                |
| <b>TGF-<math>\beta</math>1</b> | 9016         | PE               | R&D systems         | IC240P                |

**Suppl. Table 3.** Tools for immunohistochemistry

| <b>Target</b>                     | <b>Clone</b> | <b>Manufacturer</b>                     | <b>Product number</b> |
|-----------------------------------|--------------|-----------------------------------------|-----------------------|
| <b><math>\beta</math>-Actin</b>   | AC-15        | Sigma-Aldrich                           | A5441                 |
| <b><math>\beta</math>-catenin</b> | 8E7          | Millipore                               | 05-665                |
| <b>CBS</b>                        | G-1          | Santa-Cruz                              | sc-271886             |
| <b>c-kit/CD-117</b>               | polyclonal   | Biorbyt                                 | orb156377             |
| <b>laminin</b>                    | polyclonal   | Sigma-Aldrich                           | #L-9393               |
| <b>MUC5AC</b>                     | 45M1         | Thermoscientific                        | #ms145p               |
| <b>Nrf2</b>                       | polyclonal   | Abcam                                   | ab31163               |
| <b>sm-MHC</b>                     | SM-M10       | Neomarkers                              | MS-1348-P0            |
| <b>tryptase</b>                   | AA1          | Dako                                    | M705229-2             |
| <b>Type I MyHC</b>                | A4.840       | Developmental Studies<br>Hybridoma Bank | A4.840                |

**Suppl. Table 4.** Primers for PCR

| <b><math>\beta</math>-actin</b> | TGGCTACAGTTTCACCA            | GGAAGGAGGGCTGGAAGA         |
|---------------------------------|------------------------------|----------------------------|
| <b>CRTH2</b>                    | TACACAAGGGGAAGCTCGG          | CCAGTTTGGTCTCAGCCTTC       |
| <b>FoxA2</b>                    | CCTTCAACGACTGCTTCCTC         | TAGCTGCTTCTCGCACTTGA       |
| <b>FoxA3</b>                    | TTCGAGAATGGCTGCTACCT         | AAATAGGGCGTGGAGGAAGT       |
| <b>GAPDH</b>                    | GTCGGTTGTGGATCTGACCT         | TGCTGTAGCCGAACCTATTG       |
| <b>GAPDH</b>                    | CATCACCATCTTCCAGGAGCGA       | GTCTTCTGGGTGGCAGTGATGG     |
| <b>IL-4</b>                     | TGCTGCACCATACAGCCTAC         | CGGAGTTCACCTCACTGGACA      |
| <b>IL-5</b>                     | TACACAAGGGGAAGCTCGG          | CCAGTTTGGTCTCAGCCTTC       |
| <b>IL-13</b>                    | TCACCCAGGATCAGAAGACC         | CCACCTCGATCTTGGTGTCT       |
| <b>MUC5AC</b>                   | CCCTTCAGTGAGACCTCTGC         | CTGACCCAGCAGGATAGAGC       |
| <b>P2X2</b>                     | GCTGCTCATCCTGCTCTACTTT       | GGGCTTCACATACTCCTCCAC      |
| <b>P2X3</b>                     | AGGGAGGCTGAGAACTTCAC         | CAGCCAATCTTGATGCCAG        |
| <b>PTGDS</b>                    | CCCTTCAGTGAGACCTCTGC         | CTGACCCAGCAGGATAGAGC       |
| <b>SPDEF</b>                    | CCCTGTCTGAGGAGCAGTTC         | GATGCCCTTCTCCTTGTTGA       |
| <b>TRPA1</b>                    | AGAGATCAAGGCGCTGGAA          | CCCATAACTGGCTGCAAAT        |
| <b>TRPA1</b>                    | CATTTTGCTGCAACCCAAGGAGCCACTG | ATAAGTGGAGAGCGTCCTTCAGAATC |
| <b>TRPV1</b>                    | CCAACAAGAAGGGGTTTACA         | ACAGGTCATAGAGCGAGGAG       |
| <b>TRPV4</b>                    | TGGGCAAGAACTCAGATGGC         | TCCACAGTCCTAGAGGGGAG       |
